# Supplementary material
Source: HighWire-hosted journal article supplement (https://www.ajevonline.org/highwire/filestream/12236/field_highwire_adjunct_files/0/SupplementalData.pdf)
Supplement: SupplementalData.pdf [file SupplementalData.pdf]

**Supplemental Data for:**

Liu M, Song Y, Liu H, Tang M, Yao Y, Zhai H, Gao Z and Du Y. 2021.

Effects of flower cluster tip removal on phenolics and antioxidant activity of grape berries and wines.

Am J Enol Vitic 72:298-306. doi: 10.5344/ajev.2021.20072.

| Supplemental Table 1 Daily average temperature, sunlight hours, and rainfall in Penglai during 2017 to 2018. |      |       |       |       |       |        |           |
|--------------------------------------------------------------------------------------------------------------|------|-------|-------|-------|-------|--------|-----------|
| Climate conditions                                                                                           | Year | April | May   | June  | July  | August | September |
| Daily average temperature (°C)                                                                               | 2017 | 14.78 | 21.37 | 24.08 | 27.88 | 26.61  | 23.21     |
|                                                                                                              | 2018 | 15.62 | 20.56 | 25.72 | 26.71 | 27.08  | 21.31     |
| Sunlight hours (hr)                                                                                          | 2017 | 253.7 | 327.4 | 286.5 | 168.7 | 185.3  | 245.2     |
|                                                                                                              | 2018 | 253.5 | 261.1 | 257.2 | 247.7 | 261    | 211.7     |
| Rainfall (mm)                                                                                                | 2017 | 13.2  | 9     | 22    | 156.8 | 190.2  | 10.2      |
|                                                                                                              | 2018 | 46.6  | 60.6  | 55.2  | 55    | 100.4  | 4.8       |

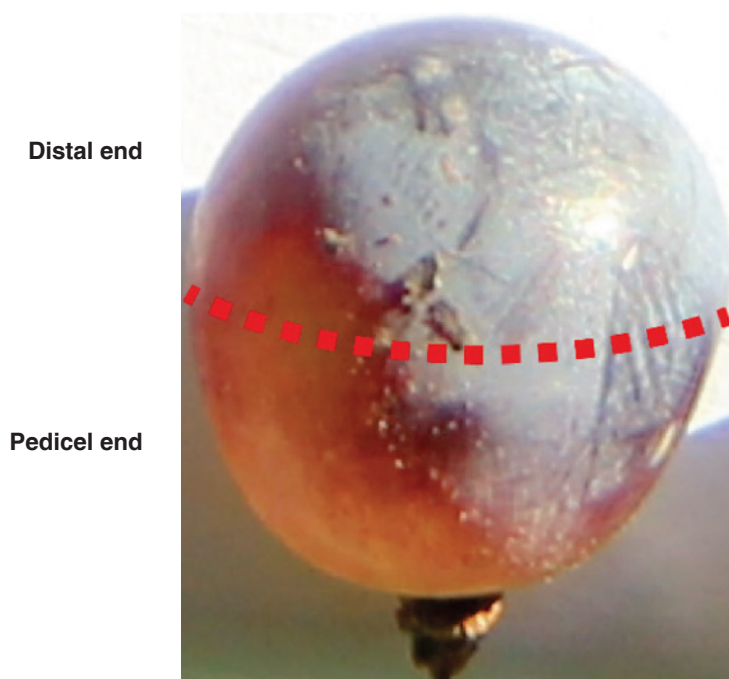

**Supplemental Figure 1** The skin of each berry was divided into two types: the pedicel end and the distal end.
